# Supplementary material
Source: PubMed Central journal article supplement (PMC6712533)
Supplement: ba024729-suppl1.pdf [file ba024729-suppl1.pdf]

**Supplemental Material:**

- **Supplemental Methods**
- **Supplemental Figure 1** – Characteristics of CH variants
- **Supplemental Table 1** – List of genes and regions covered by custom Ion Torrent amplicon-based library panel
- **Supplemental Table 2** – CH/subtypes vs. age and sex
- **Supplemental Table 3** – Complete variant call list
- **Supplemental Table 4** – CH/subtypes group demographics
- **Supplemental Table 5** – CH/subtypes and laboratory values
- **Supplemental Table 6** – CH/subtypes and specific comorbidities
- **Supplemental Table 7** – CH/subtypes and cytokine values

**Supplemental Methods****NGS for CH determination**

Peripheral blood samples from participants were collected in PAXgene tubes (Qiagen), stored at -20°C before use, and DNA was isolated according to the standard kit protocols. Thereafter, amplicon library generation and next-generation sequencing (NGS) were performed as previously described and applied to a myelodysplastic syndrome clinical trial.<sup>1</sup> Briefly, 15-20 ng of bead-purified DNA (AxyPrep FragmentSelect-I beads, Axygen MAG-FRAG-I-5) was converted into barcoded DNA libraries using the Ion Torrent next-generation sequencing kit (Thermo Fisher Scientific), and purified again (AMPure XP beads, Beckman Coulter A63881). Libraries consisted of 1554 amplicons covering a panel of 48 genes commonly mutated in myeloid cancer (see Supplemental Table 1 for the complete gene list; specific amplicon sequences available upon request). Of note, this list did not include *PPM1D*. DNA libraries were sequenced on the Ion Proton (Thermo Fisher Scientific) at Queen's Genomics Lab at Ongwanada (Kingston, ON, Canada) at a mean depth of 1757.1X (uniformity of 90.3% and 97.1% on target), aligned to the

human genome reference hg19 with tmap, and variants were annotated with Ion Reporter software (versions 4.6 – 5.6).

Variants (SNVs and indels) were filtered in based on the following inclusion rules: exonic location, non-synonymous substitution, p-value <0.01, coverage >50, VAF between 0.02 and 0.43. Furthermore, variants were excluded if: present in UCSC Common SNP Database, minor allele frequency (MAF) >0.02, Global/European/American MAF >0.02. This filtered list was visually inspected in the Integrative Genomics Viewer (IGV, Broad Institute) to rule out false positives (on amplicon edges, strand bias, poor mapping quality, and presence in other samples). Borderline filtered out variants were evaluated as well. Next, variants were excluded if they did not meet previously vetted criteria for candidate driver mutations.<sup>2</sup> Finally, a sampling of CH variant calls were confirmed (20/21) using an independent NGS platform (HiSeq 4000, Illumina; data not shown) as part of a separate RNA-seq study (in prep.).

### **Laboratory blood values**

A clinical laboratory at Sunnybrook Hospital (Toronto, Canada) quantified blood values: hemoglobin, platelets, monocytes, white blood cells (WBC), absolute neutrophil count (ANC), absolute lymphocyte count (ALC), red blood cell distribution width (RDW), mean corpuscular volume (MCV), reticulocyte count, lactate dehydrogenase (LDH), ferritin, iron, total iron binding capacity (TIBC), vitamin B12, thyroid stimulating hormone (TSH), C-reactive protein (CRP), aspartate aminotransferase (AST), alanine aminotransferase (ALT), bilirubin (t bili), creatinine, creatinine clearance, albumin, calcium.

### **Cytokines**

Blood samples were allowed to clot for 15-20 min and then centrifuged for 12 min at 2000 x g and 4°C, cryopreserved serum was aliquoted and a subset (N=297) run on a 42-plex cytokine array (SKU HD42, Eve Technologies, Calgary, AB, Canada) to quantify cytokine/chemokine levels (EGF, FGF-2, Eotaxin-1, TGF $\alpha$ , G-CSF, Flt-3L, GM-CSF, Fractalkine, IFN $\alpha$ 2, IFN $\gamma$ , GRO $\alpha$ , IL-10, MCP-3, IL-12 P40, MDC, IL-12 P70, PDGF-AA, IL-13, PDGF-BB, IL-15, sCD40L, IL-17A, IL-1RA, IL-

1 $\alpha$ , IL-9, IL-1 $\beta$ , IL-2, IL-3, IL-4, IL-5, IL-6, IL-7, IL-8, IP-10/CXCL-10, MCP-1, MIP-1 $\alpha$ , MIP-1 $\beta$ , RANTES, TNF $\alpha$ , TNF $\beta$ , VEGFA, IL-18).

### Statistics

The study was originally designed to determine the prevalence of CH (unknown in early 2014) and the proportion of CH with lab abnormalities (particularly anemia) and comorbidities. We determined our sample size according to an OR we felt was clinically significant (OR=4). We assumed: 1. 20-30% anemic participants would comprise cases and 70-80% non-anemic participants controls; 2. 33% of anemia would be unexplainable (defined as not potentially attributable to iron or vitamin B12 deficiency, renal insufficiency (creatinine clearance <30ml/min) or inflammatory states (CRP >10mg/L)) and 33% of these would harbour CH. The expected exposure rate of CH was therefore 10.9% (0.33 $\times$ 0.33) among cases. We calculated a sample size up to 420 was expected to be required to achieve 80% power and 5% significance level (2-sided).

The following categorical groups were compared in post-hoc analyses: any mutation (CH) vs. no mutation, VAF>0.1 (CH<sub>VAF>0.1</sub>) vs. VAF $\leq$ 0.1 or no mutation call, >1 mutation (CH<sub>mut>1</sub>) vs. 1 or no mutation, *TET2* mutation (CH<sub>TET2</sub>) vs. no mutation, and *DNMT3A* mutation (CH<sub>DNMT3A</sub>) vs. no mutation. For plotted median cytokine levels, the VAF and mutation count groups were stratified further to show dose-response.

### References

1. Sekeres MA, Othus M, List AF, et al. Randomized Phase II Study of Azacitidine Alone or in Combination With Lenalidomide or With Vorinostat in Higher-Risk Myelodysplastic Syndromes and Chronic Myelomonocytic Leukemia: North American Intergroup Study SWOG S1117. *J Clin Oncol*. 2017;35(24):2745-2753.
2. Lindsley RC, Saber W, Mar BG, et al. Prognostic Mutations in Myelodysplastic Syndrome after Stem-Cell Transplantation. *N Engl J Med*. 2017;376(6):536-547.

**Supplemental Figure 1. Characteristics of CH variants.** (A) The location of CH mutations with respect to affected amino acids in *TET2* and *DNMT3A* are shown on the x-axis, while the y-axis depicts the number of mutations called in the cohort. (B) Exons affected by mutations and their counts in *TET2* and *DNMT3A* (gray = frameshift; yellow = splice site; green = non-frameshift indel; red = nonsense; black = missense). (C) Number of participants with 1 mutation or >1 mutation calls. (D) Range of variant allele fraction (VAF, 0.03-0.43) by count. (E) VAF plots for CH with mutations in *DNMT3A* (yellow), *TET2* (grey) or other genes (blue) including median and interquartile range. (F) Percentage of indicated single nucleotide base-pair substitutions in CH mutation calls.

**Supplemental Figure 1**

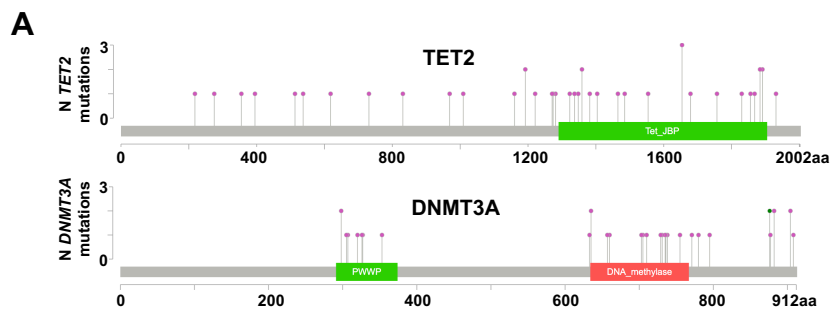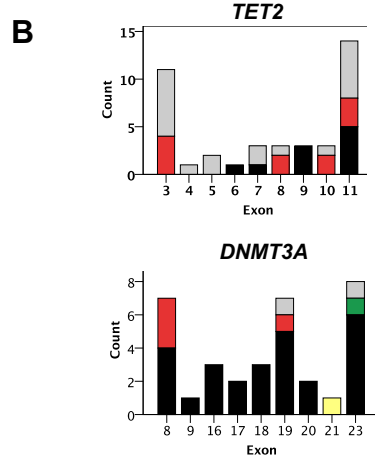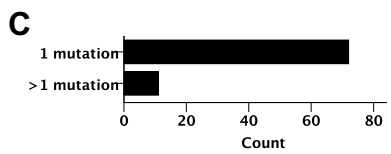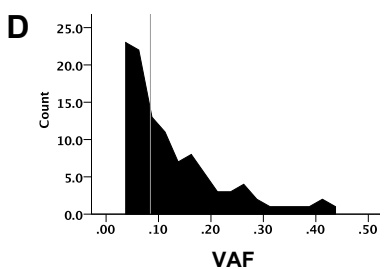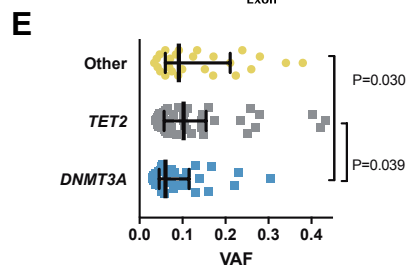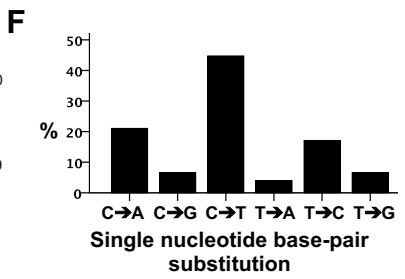

Supplemental Table 1. List of genes and regions covered by custom Ion Torrent amplicon-based library panel

| Name   | Chromosome | Chr_Start | Chr_End   | Num_Amplicons | Total_Bases | Covered_Bases | Missed_Bases | Overall_Coverage | Exons         |
|--------|------------|-----------|-----------|---------------|-------------|---------------|--------------|------------------|---------------|
| ASXL1  | chr20      | 31021087  | 31021720  | 7             | 633         | 633           | 0            | 1                | 11            |
| ASXL1  | chr20      | 31022235  | 31027122  | 44            | 4887        | 4653          | 234          | 0.9521           |               |
| BCOR   | chrX       | .         | .         | 58            | 5661        | 5419          | 242          | 0.9573           | CDS           |
| BCORL1 | chrX       | .         | .         | 57            | 5256        | 5189          | 67           | 0.9873           | CDS           |
| BOD1L  | chr4       | .         | .         | 106           | 9416        | 9031          | 385          | 0.9591           | CDS           |
| BRAF   | chr7       | 140453075 | 140453193 | 2             | 118         | 118           | 0            | 1                | 15            |
| BRCC3  | chrX       | 154299800 | 154299925 | 2             | 125         | 125           | 0            | 1                | 1, 4          |
| BRCC3  | chrX       | 154305445 | 154305564 | 2             | 119         | 119           | 0            | 1                |               |
| CALR   | chr19      | 13054527  | 13055304  | 7             | 777         | 672           | 105          | 0.865            | 9             |
| CBL    | chr11      | .         | .         | 37            | 2881        | 2794          | 87           | 0.9698           | CDS           |
| CEBPA  | chr19      | .         | .         | 8             | 1087        | 799           | 288          | 0.7351           | CDS           |
| CSF3R  | chr1       | .         | .         | 36            | 3555        | 3444          | 111          | 0.9688           | CDS           |
| CUX1   | chr7       | .         | .         | 72            | 5896        | 5361          | 535          | 0.9093           | CDS           |
| DNMT3A | chr2       | .         | .         | 45            | 3385        | 3211          | 174          | 0.9486           | CDS           |
| ETV6   | chr12      | .         | .         | 18            | 1439        | 1328          | 111          | 0.9229           | CDS           |
| EZH2   | chr7       | .         | .         | 36            | 2732        | 2732          | 0            | 1                | CDS           |
| FLT3   | chr13      | .         | .         | 49            | 3222        | 3167          | 55           | 0.9829           | CDS           |
| GATA1  | chrX       | 48649498  | 48649736  | 2             | 238         | 193           | 45           | 0.811            | 2, 3          |
| GATA1  | chrX       | 48650251  | 48650628  | 4             | 377         | 315           | 62           | 0.836            |               |
| GATA2  | chr3       | .         | .         | 15            | 1587        | 1479          | 108          | 0.9319           | CDS           |
| GNAS   | chr20      | .         | .         | 45            | 6100        | 5371          | 729          | 0.8805           | CDS           |
| GNB1   | chr1       | .         | .         | 15            | 1113        | 1113          | 0            | 1                | CDS           |
| IDH1   | chr2       | .         | .         | 20            | 1325        | 1236          | 89           | 0.9328           | CDS           |
| IDH2   | chr15      | .         | .         | 20            | 1469        | 1334          | 135          | 0.9081           | CDS           |
| JAK2   | chr9       | .         | .         | 52            | 3629        | 3596          | 33           | 0.9909           | CDS           |
| KDM6A  | chrX       | .         | .         | 62            | 4496        | 4327          | 169          | 0.9624           | CDS           |
| KIT    | chr4       | 55593384  | 55593490  | 1             | 106         | 106           | 0            | 1                | 8, 10, 11, 17 |
| KIT    | chr4       | 55593582  | 55593708  | 2             | 126         | 126           | 0            | 1                |               |
| KIT    | chr4       | 55599236  | 55599358  | 1             | 122         | 122           | 0            | 1                |               |
| KIT    | chr4       | 55589750  | 55589864  | 1             | 114         | 114           | 0            | 1                |               |
| KRAS   | chr12      | .         | .         | 10            | 737         | 597           | 140          | 0.81             | CDS           |
| MPL    | chr1       | 43814934  | 43815030  | 1             | 96          | 96            | 0            | 1                | 10            |
| NF-E2  | chr12      | 54688919  | 54689088  | 2             | 169         | 169           | 0            | 1                | 2, 3          |
| NF-E2  | chr12      | 54685891  | 54687165  | 12            | 1274        | 1269          | 5            | 0.9961           |               |
| NF1    | chr17      | .         | .         | 132           | 9251        | 9150          | 101          | 0.9891           | CDS           |
| NPM1   | chr5       | .         | .         | 17            | 1014        | 884           | 130          | 0.8718           | CDS           |
| NRAS   | chr1       | .         | .         | 9             | 610         | 610           | 0            | 1                | CDS           |
| PHF6   | chrX       | .         | .         | 18            | 1585        | 1585          | 0            | 1                | CDS           |
| PTPN11 | chr12      | 112926828 | 112926979 | 2             | 151         | 151           | 0            | 1                | 3, 7, 8, 13   |
| PTPN11 | chr12      | 112888122 | 112888316 | 2             | 194         | 194           | 0            | 1                |               |
| PTPN11 | chr12      | 112910748 | 112910844 | 2             | 96          | 96            | 0            | 1                |               |
| PTPN11 | chr12      | 112915455 | 112915534 | 1             | 79          | 79            | 0            | 1                |               |
| RAD21  | chr8       | .         | .         | 31            | 2026        | 1953          | 73           | 0.964            | CDS           |
| RIT1   | chr1       | .         | .         | 11            | 710         | 710           | 0            | 1                | CDS           |
| RUNX1  | chr21      | .         | .         | 20            | 1842        | 1731          | 111          | 0.9397           | CDS           |
| SETBP1 | chr18      | .         | .         | 49            | 5040        | 4781          | 259          | 0.9486           | CDS           |
| SF3B1  | chr2       | .         | .         | 63            | 4195        | 4154          | 41           | 0.9902           | CDS           |
| SH2B3  | chr12      | 111855923 | 111856681 | 6             | 758         | 510           | 248          | 0.673            | 2             |
| SMC1A  | chrX       | .         | .         | 55            | 3952        | 3952          | 0            | 1                | CDS           |
| SMC3   | chr10      | .         | .         | 60            | 3944        | 3813          | 131          | 0.9668           | CDS           |
| SRSF2  | chr17      | .         | .         | 6             | 686         | 664           | 22           | 0.968            | CDS           |
| STAG2  | chrX       | .         | .         | 68            | 4137        | 4072          | 65           | 0.9843           | CDS           |
| TET2   | chr4       | .         | .         | 62            | 9607        | 9489          | 118          | 0.9877           | CDS           |
| TLR2   | chr4       | .         | .         | 23            | 2365        | 2172          | 193          | 0.9184           | CDS           |
| TP53   | chr17      | .         | .         | 22            | 1556        | 1556          | 0            | 1                | CDS           |
| U2AF1  | chr21      | .         | .         | 16            | 920         | 920           | 0            | 1                | CDS           |
| WT1    | chr11      | 32417803  | 32417953  | 2             | 150         | 150           | 0            | 1                | 7, 9          |
| WT1    | chr11      | 32413527  | 32413610  | 1             | 83          | 83            | 0            | 1                |               |
| ZRSR2  | chrX       | .         | .         | 23            | 1559        | 1543          | 16           | 0.9897           | CDS           |

| <b>Supplemental Table 2. CH/subtypes vs. age and sex</b>     |                                    |                    |           |                     |                     |                           |
|--------------------------------------------------------------|------------------------------------|--------------------|-----------|---------------------|---------------------|---------------------------|
| <b>CHIP/ARCH group comparison, N</b>                         | <b>Possible confounding factor</b> | <b>Raw p-value</b> | <b>OR</b> | <b>Lower 95% CI</b> | <b>Upper 95% CI</b> | <b>Analyses adjusted?</b> |
| <b>Any mutation (CH) N=83 vs. no mutation N=276</b>          |                                    |                    |           |                     |                     |                           |
|                                                              | Age (years)                        | 0.0123             | 1.04      | 1.009               | 1.072               | Yes                       |
|                                                              | Sex (Male vs. Female)              | 0.3803             | 1.114     | 0.662               | 1.851               | No                        |
| <b>VAF&gt;0.1 N=36 vs. VAF&lt;0.1 or no mutation N=323</b>   |                                    |                    |           |                     |                     |                           |
|                                                              | Age (years)                        | 0.0266             | 1.05      | 1.006               | 1.098               | Yes                       |
|                                                              | Sex (Male vs. Female)              | 0.538              | 1.249     | 0.603               | 2.514               | No                        |
| <b>Mutation count &gt;1 N=11 vs. mutation count ≤1 N=348</b> |                                    |                    |           |                     |                     |                           |
|                                                              | Age (years)                        | 0.0325             | 1.091     | 1.011               | 1.187               | Yes                       |
|                                                              | Sex (Male vs. Female)              | 0.1615             | 2.369     | 0.7                 | 8.374               | No                        |
| <b>TET2 mutation N=34 vs. no mutation N=276</b>              |                                    |                    |           |                     |                     |                           |
|                                                              | Age (years)                        | 0.0604             | 1.044     | 0.999               | 1.093               | No                        |
|                                                              | Sex (Male vs. Female)              | 0.0628             | 1.963     | 0.963               | 4.005               | No                        |
| <b>DNMT3A mutation N=32 vs. no mutation N=276</b>            |                                    |                    |           |                     |                     |                           |
|                                                              | Age (years)                        | 0.3442             | 1.022     | 0.978               | 1.069               | No                        |
|                                                              | Sex (Male vs. Female)              | 0.3598             | 0.681     | 0.284               | 1.491               | No                        |

Supplemental Table 3. Complete variant call list

| gene   | VAF   | locus              | type        | ref         | genotype    | pvalue | coverage | codon        | exon                   | protein                  | coding | sift   | location | function |
|--------|-------|--------------------|-------------|-------------|-------------|--------|----------|--------------|------------------------|--------------------------|--------|--------|----------|----------|
| ASXL1  | 0.04  | chr20:310222>SNV   | C           | C/A         | 0.003355985 | 1302   | TAA      | 12           | p.Tyr591Ter            | c.1773C>A                | exonic | nonse  |          |          |
| ASXL1  | 0.07  | chr20:310222>SNV   | C           | C/A         | 0           | 2000   | TAA      | 12           | p.Tyr591Ter            | c.1773C>A                | exonic | nonse  |          |          |
| BCOR   | 0.13  | chrX:3991357>INDEL | GA          | GA/G        | 0           | 828    | CCC      | 13           | p.Leu1586fs            | c.4757_4757delT          | exonic | frame  |          |          |
| CBL    | 0.05  | chr11:119149>SNV   | T           | T/G         | 2.03119E-09 | 1999   | TGC      | 9            | p.Phe418Cys            | c.1253T>G                | exonic | misse  |          |          |
| CUX1   | 0.17  | chr7:1018448>INDEL | TC          | TC/T        | 0           | 345    | CCA      | 18           | p.Ala761fs             | c.2280_2280delC          | exonic | frame  |          |          |
| DNMT3A | 0.079 | chr2:2545715>INDEL | CAAAAT      | CAAAAT/CAA  | 0           | 1958   | TTT      | 23           | p.Tyr908fs             | c.2723delA               | exonic | frame  |          |          |
| DNMT3A | 0.03  | chr2:2545717>SNV   | G           | G/A         | 0.015498869 | 1286   | CTG      | 23           | p.Pro904Leu            | c.2711C>T                | 0      | exonic | misse    |          |
| DNMT3A | 0.06  | chr2:2545717>SNV   | G           | G/A         | 1.06812E-10 | 1192   | CTG      | 23           | p.Pro904Leu            | c.2711C>T                | 0      | exonic | misse    |          |
| DNMT3A | 0.17  | chr2:2545724>SNV   | G           | G/A         | 0           | 2000   | TGC      | 23           | p.Arg882Cys            | c.2644C>T                | 0      | exonic | misse    |          |
| DNMT3A | 0.10  | chr2:2545724>SNV   | G           | G/A         | 0           | 1999   | TGC      | 23           | p.Arg882Cys            | c.2644C>T                | 0      | exonic | misse    |          |
| DNMT3A | 0.051 | chr2:2545725>SNV   | C           | C/A         | 1.8433E-11  | 1999   | TTC      | 23           | p.Val877Phe            | c.2629G>T                | 0      | exonic | misse    |          |
| DNMT3A | 0.052 | chr2:2545725>INDEL | GTCAAGTATAG | GTCAAGTATAG | 1.333E-12   | 1982   | 23       | p.Phe870_Asp | c.2610_2627delCCCAGTCC | exonic                   | nonfr  |        |          |          |
| DNMT3A | 0.036 | chr2:2545726>SNV   | T           | T/G         | 0.000965028 | 2000   | GCC      | 23           | p.Asp876Ala            | c.2627A>C                | exonic | misse  |          |          |
| DNMT3A | 0.22  | chr2:2545980>SNV   | A           | A/C         | 0           | 2000   | 21       |              |                        | spliceite                | none   |        |          |          |
| DNMT3A | 0.07  | chr2:2546202>SNV   | C           | C/A         | 0           | 1999   | TTG      | 20           | p.Trp795Leu            | c.2384G>T                | 0      | exonic | misse    |          |
| DNMT3A | 0.14  | chr2:2546206>SNV   | A           | A/G         | 0           | 2000   | ACT      | 20           | p.Ile780Thr            | c.2339T>C                | exonic | misse  |          |          |
| DNMT3A | 0.06  | chr2:2546318>SNV   | G           | G/A         | 0           | 1827   | TGA      | 19           | p.Arg771Ter            | c.2311C>T                | exonic | nonse  |          |          |
| DNMT3A | 0.05  | chr2:2546322>SNV   | A           | A/G         | 3.065E-07   | 1781   | TCT      | 19           | p.Phe755Ser            | c.2264T>C                | 0      | exonic | misse    |          |
| DNMT3A | 0.13  | chr2:2546326>INDEL | GGGCCGCGCA  | GGGCCGCGCA  | 0           | 1691   | CCA      | 19           | p.Leu738fs             | c.2213_2228delITGCATGATG | exonic | frame  |          |          |
| DNMT3A | 0.03  | chr2:2546328>SNV   | C           | C/T         | 0.062324672 | 2000   | CAC      | 19           | p.Arg736His            | c.2207G>A                | exonic | misse  |          |          |
| DNMT3A | 0.05  | chr2:2546328>SNV   | T           | T/C         | 5.39324E-06 | 1265   | TGC      | 19           | p.Tyr735Cys            | c.2204A>G                | 0      | exonic | misse    |          |
| DNMT3A | 0.09  | chr2:2546330>SNV   | A           | A/T         | 0           | 917    | TAC      | 19           | p.Phe731Tyr            | c.2192T>A                | 0      | exonic | misse    |          |
| DNMT3A | 0.16  | chr2:2546330>SNV   | C           | C/A         | 0           | 2000   | CTG      | 19           | p.Arg729Leu            | c.2186G>T                | exonic | misse  |          |          |
| DNMT3A | 0.05  | chr2:2546355>SNV   | A           | A/T         | 2.11E-13    | 1997   | AGC      | 18           | p.Cys710Ser            | c.2128T>A                | 0      | exonic | misse    |          |
| DNMT3A | 0.08  | chr2:2546356>SNV   | A           | A/G         | 0           | 2000   | ACT      | 18           | p.Ile705Thr            | c.2114T>C                | exonic | misse  |          |          |
| DNMT3A | 0.08  | chr2:2546357>SNV   | G           | G/C         | 7.89E-13    | 720    | GTG      | 18           | p.Leu703Val            | c.2107C>G                | 0      | exonic | misse    |          |
| DNMT3A | 0.11  | chr2:2546453>SNV   | T           | T/G         | 0           | 1998   | TCC      | 17           | p.Tyr660Ser            | c.1979A>C                | 0.01   | exonic | misse    |          |
| DNMT3A | 0.11  | chr2:2546454>SNV   | C           | C/T         | 0           | 2000   | ATG      | 17           | p.Val657Met            | c.1969G>A                | 0      | exonic | misse    |          |
| DNMT3A | 0.05  | chr2:2546680>SNV   | G           | G/A         | 1.12502E-09 | 2000   | TGG      | 16           | p.Arg635Trp            | c.1903C>T                | 0      | exonic | misse    |          |
| DNMT3A | 0.03  | chr2:2546680>SNV   | G           | G/A         | 0.006777507 | 1999   | TGG      | 16           | p.Arg635Trp            | c.1903C>T                | 0      | exonic | misse    |          |
| DNMT3A | 0.038 | chr2:2546680>SNV   | G           | G/A         | 0.00892627  | 848    | CTC      | 16           | p.Pro633Leu            | c.1898C>T                | 0      | exonic | misse    |          |
| DNMT3A | 0.03  | chr2:2546998>SNV   | G           | G/C         | 0.00937303  | 2000   | GGG      | 9            | p.Ala353Gly            | c.1058C>G                | 0.36   | exonic | misse    |          |
| DNMT3A | 0.05  | chr2:2547049>SNV   | C           | C/T         | 1.43136E-05 | 904    | TGA      | 8            | p.Trp327Ter            | c.981G>A                 | exonic | nonse  |          |          |
| DNMT3A | 0.23  | chr2:2547049>SNV   | G           | G/A         | 0           | 1996   | TGC      | 8            | p.Arg326Cys            | c.976C>T                 | 0      | exonic | misse    |          |
| DNMT3A | 0.31  | chr2:2547051>SNV   | G           | G/A         | 0           | 2000   | TGA      | 8            | p.Arg320Ter            | c.958C>T                 | exonic | nonse  |          |          |
| DNMT3A | 0.13  | chr2:2547055>SNV   | G           | G/A         | 0           | 1998   | CTA      | 8            | p.Pro307Leu            | c.920C>T                 | 0      | exonic | misse    |          |
| DNMT3A | 0.05  | chr2:2547055>SNV   | C           | C/T         | 5.04127E-10 | 1972   | TGA      | 8            | p.Trp305Ter            | c.915G>A                 | exonic | nonse  |          |          |
| DNMT3A | 0.05  | chr2:2547058>SNV   | C           | C/T         | 4.94857E-10 | 2000   | GAG      | 8            | p.Gly298Glu            | c.893G>A                 | 0      | exonic | misse    |          |
| DNMT3A | 0.04  | chr2:2547058>SNV   | C           | C/T         | 0.000238111 | 1997   | AGG      | 8            | p.Gly298Arg            | c.892G>A                 | 0      | exonic | misse    |          |
| GNAS   | 0.07  | chr20:574844>SNV   | C           | C/T         | 0           | 2000   | TGT      | 8            | p.Arg844Cys            | c.2530C>T                | 0      | exonic | misse    |          |
| GNAS   | 0.07  | chr20:574844>SNV   | G           | G/A         | 1.25271E-10 | 663    | CAT      | 8            | p.Arg844His            | c.2531G>A                | 0      | exonic | misse    |          |
| GNAS   | 0.09  | chr20:574844>SNV   | G           | G/A         | 0           | 2000   | CAT      | 8            | p.Arg844His            | c.2531G>A                | 0      | exonic | misse    |          |
| GNB1   | 0.12  | chr1:1747227>SNV   | C           | C/A         | 0           | 1997   | AAT      | 5            | p.Lys57Asn             | c.171G>T                 | exonic | misse  |          |          |
| GNB1   | 0.172 | chr1:1747229>SNV   | T           | T/C         | 0           | 1995   | GAG      | 5            | p.Lys57Glu             | c.169A>G                 | 0      | exonic | misse    |          |
| GNB1   | 0.152 | chr1:1747229>SNV   | T           | T/C         | 0           | 1974   | GAG      | 5            | p.Lys57Glu             | c.169A>G                 | 0      | exonic | misse    |          |
| JAK2   | 0.10  | chr9:5073770>SNV   | G           | G/T         | 0           | 657    | TTC      | 14           | p.Val617Phe            | c.1849G>T                | exonic | misse  |          |          |
| JAK2   | 0.239 | chr9:5073770>SNV   | G           | G/T         | 0           | 1990   | TTC      | 14           | p.Val617Phe            | c.1849G>T                | 0      | exonic | misse    |          |
| KDM6A  | 0.09  | chrX:4492276>SNV   | C           | C/T         | 0           | 1991   | TAG      | 16           | p.Gln544Ter            | c.1630C>Tc.1630C>T       | exonic | nonse  |          |          |
| MPL    | 0.28  | chr1:4381500>SNV   | G           | G/T         | 0           | 1995   | TTG      | 10           | p.Trp515Leu            | c.1544G>T                | 0.25   | exonic | misse    |          |
| PHF6   | 0.06  | chrX:1335276>SNV   | T           | T/A         | 5.14375E-10 | 932    | AAC      | 4            | p.Tyr124Asn            | c.370T>A                 | 0      | exonic | misse    |          |
| SF3B1  | 0.26  | chr2:1982668>SNV   | T           | T/C         | 0           | 1971   | GAA      | 15           | p.Lys700Glu            | c.2098A>G                | 0      | exonic | misse    |          |
| SF3B1  | 0.22  | chr2:1982668>SNV   | T           | T/C         | 0           | 1981   | GAA      | 15           | p.Lys700Glu            | c.2098A>G                | 0      | exonic | misse    |          |
| SF3B1  | 0.03  | chr2:1982673>SNV   | C           | C/G         | 0.016647921 | 1292   | AAC      | 14           | p.Lys666Asn            | c.1998G>C                | 0      | exonic | misse    |          |



|       |       |              |       |           |             |             |      |     |                 |                        |             |       |
|-------|-------|--------------|-------|-----------|-------------|-------------|------|-----|-----------------|------------------------|-------------|-------|
| SF3B1 | 0.05  | chr2:1982673 | SNV   | C         | C/A         | 8.04915E-09 | 1998 | AAT | 14 p.Lys666Asn  | c.1998G>T              | exonic      | misse |
| SF3B1 | 0.08  | chr2:1982673 | SNV   | C         | C/A         | 0           | 1571 | AAT | 14 p.Lys666Asn  | c.1998G>T              | exonic      | misse |
| SRSF2 | 0.211 | chr17:747329 | SNV   | G         | G/T         | 0           | 256  | CAC | 1 p.Pro95His    | c.284C>A               | 0.01 exonic | misse |
| SRSF2 | 0.075 | chr17:747329 | SNV   | G         | G/A         | 0.000359807 | 146  | CTC | 1 p.Pro95Leu    | c.284C>T               | 0 exonic    | misse |
| SRSF2 | 0.38  | chr17:747329 | SNV   | G         | G/C         | 0           | 1137 | CGC | 1 p.Pro95Arg    | c.284C>G               | 0.05 exonic | misse |
| TET2  | 0.25  | chr4:1061557 | INDEL | TC        | TC/T        | 0           | 982  | TGG | 3 p.Val218fs    | c.651delC              | exonic      | frame |
| TET2  | 0.04  | chr4:1061559 | INDEL | TC        | TC/T        | 3.67968E-06 | 1985 | ATT | 3 p.Asn275fs    | c.822delC              | exonic      | frame |
| TET2  | 0.11  | chr4:1061561 | INDEL | TCAGGTTTC | TCAGGTTTC/T | 6.61302E-09 | 188  | GCA | 3 p.Gly355fs    | c.1064_1070delGTTCCAG  | exonic      | frame |
| TET2  | 0.05  | chr4:1061562 | INDEL | GC        | GC/G        | 6.45922E-08 | 1988 | CTA | 3 p.Thr395fs    | c.1182delC             | exonic      | frame |
| TET2  | 0.078 | chr4:1061566 | INDEL | CA        | CA/C        | 2.3E-14     | 741  | AGC | 3 p.Lys513fs    | c.1538delA             | exonic      | frame |
| TET2  | 0.10  | chr4:1061567 | INDEL | C         | C/CA        | 0           | 1992 | AGA | 3 p.Glu537fs    | c.1605_1606insA        | exonic      | frame |
| TET2  | 0.103 | chr4:1061569 | SNV   | C         | C/T         | 0           | 1492 | TAA | 3 p.Gln618Ter   | c.1852C>T              | exonic      | nonse |
| TET2  | 0.27  | chr4:1061572 | SNV   | C         | C/T         | 0           | 568  | TAA | 3 p.Gln731Ter   | c.2191C>T              | exonic      | nonse |
| TET2  | 0.06  | chr4:1061575 | SNV   | C         | C/T         | 7.25521E-08 | 763  | TAG | 3 p.Gln831Ter   | c.2491C>T              | exonic      | nonse |
| TET2  | 0.17  | chr4:1061580 | INDEL | AC        | AC/A        | 0           | 1989 | CAA | 3 p.Gln969fs    | c.2902_2902delC        | exonic      | frame |
| TET2  | 0.26  | chr4:1061581 | SNV   | C         | C/T         | 0           | 1995 | TAA | 3 p.Gln1009Ter  | c.3025C>T              | exonic      | nonse |
| TET2  | 0.041 | chr4:1061625 | INDEL | CTATTA    | CTATTA/C    | 7.93688E-05 | 1516 | AGA | 4 p.Ile1160fs   | c.3477_3481delTATTA    | exonic      | frame |
| TET2  | 0.10  | chr4:1061640 | INDEL | GGGATGTCC | GGGATGTCC/I | 0           | 694  | GTA | 5 p.Gly1192fs   | c.3574_3581delGGATGTCC | exonic      | frame |
| TET2  | 0.10  | chr4:1061640 | INDEL | GGGATGTCC | GGGATGTCC/I | 0           | 694  | GTA | 5 p.Gly1192fs   | c.3574_3581delGGATGTCC | exonic      | frame |
| TET2  | 0.14  | chr4:1061647 | SNV   | G         | G/A         | 0           | 1999 | TAT | 6 p.Cys1221Tyr  | c.3662G>A              | 0 exonic    | misse |
| TET2  | 0.04  | chr4:1061807 | INDEL | T         | T/TG        | 0.001423771 | 1751 | TGG | 7 p.Cys1271fs   | c.3812_3813insG        | exonic      | frame |
| TET2  | 0.15  | chr4:1061807 | SNV   | A         | A/G         | 0           | 2000 | CGG | 7 p.Gln1274Arg  | c.3821A>G              | 0 exonic    | misse |
| TET2  | 0.045 | chr4:1061808 | INDEL | AC        | AC/A        | 3.86981E-07 | 1985 | GTG | 7 p.Cys1281fs   | c.3840delC             | exonic      | frame |
| TET2  | 0.15  | chr4:1061829 | SNV   | G         | G/T         | 6.42259E-08 | 96   | TAG | 8 p.Glu1323Ter  | c.3967G>T              | exonic      | nonse |
| TET2  | 0.16  | chr4:1061829 | INDEL | CAT       | CAT/C       | 0           | 309  | TAA | 8 p.Tyr1337Ter  | c.4011_4012delITA      | exonic      | nonse |
| TET2  | 0.07  | chr4:1061830 | INDEL | AG        | AG/A        | 5.60015E-06 | 394  | CAG | 8 p.Gln1348fs   | c.4044_4044delG        | exonic      | frame |
| TET2  | 0.04  | chr4:1061907 | SNV   | C         | C/T         | 0.0051511   | 1267 | TGT | 9 p.Arg1359Cys  | c.4075C>T              | 0.08 exonic | misse |
| TET2  | 0.05  | chr4:1061907 | SNV   | G         | G/C         | 2.67553E-08 | 1189 | CCT | 9 p.Arg1359Pro  | c.4076G>C              | 0 exonic    | misse |
| TET2  | 0.091 | chr4:1061908 | SNV   | C         | C/A         | 0           | 1997 | AAC | 9 p.His1382Asn  | c.4144C>A              | 0 exonic    | misse |
| TET2  | 0.04  | chr4:1061937 | SNV   | C         | C/T         | 0.001137077 | 981  | TGA | 10 p.Arg1404Ter | c.4210C>T              | exonic      | nonse |
| TET2  | 0.06  | chr4:1061939 | SNV   | C         | C/T         | 1.3527E-11  | 1573 | TGA | 10 p.Arg1465Ter | c.4393C>T              | exonic      | nonse |
| TET2  | 0.15  | chr4:1061939 | INDEL | CA        | CA/C        | 0           | 1997 | CGC | 10 p.Ser1485fs  | c.4453_4453delA        | exonic      | frame |
| TET2  | 0.06  | chr4:1061963 | INDEL | TCAGA     | TCAGA/T     | 3.70681E-09 | 860  | GAG | 11 p.Thr1554fs  | c.4657_4660delCAGA     | exonic      | frame |
| TET2  | 0.07  | chr4:1061966 | INDEL | GTC       | GTC/G       | 0           | 1980 | GCC | 11 p.Gln1654fs  | c.4959_4960delITC      | exonic      | frame |
| TET2  | 0.06  | chr4:1061966 | INDEL | GTC       | GTC/G       | 0           | 1977 | GCC | 11 p.Gln1654fs  | c.4959_4960delITC      | exonic      | frame |
| TET2  | 0.279 | chr4:1061966 | SNV   | C         | C/T         | 0           | 1996 | TAG | 11 p.Gln1654Ter | c.4960C>T              | exonic      | nonse |
| TET2  | 0.12  | chr4:1061967 | SNV   | C         | C/A         | 5.1E-14     | 268  | TAA | 11 p.Tyr1679Ter | c.5037C>A              | exonic      | nonse |
| TET2  | 0.09  | chr4:1061969 | INDEL | T         | T/GAACATA   | 0           | 1996 | AGA | 11 p.His1757fs  | c.5262_5263insGAACATA  | exonic      | frame |
| TET2  | 0.42  | chr4:1061971 | INDEL | AT        | AT/A        | 0           | 1406 | ATG | 11 p.Leu1830fs  | c.5488_5488delIT       | exonic      | frame |
| TET2  | 0.065 | chr4:1061972 | INDEL | TG        | TG/T        | 7.23169E-05 | 339  | ATC | 11 p.Asp1856fs  | c.5566delG             | exonic      | frame |
| TET2  | 0.04  | chr4:1061972 | SNV   | C         | C/T         | 0.00050754  | 820  | TAT | 11 p.His1868Tyr | c.5602C>T              | 0 exonic    | misse |
| TET2  | 0.08  | chr4:1061973 | SNV   | A         | A/G         | 1.24328E-10 | 572  | GCC | 11 p.Thr1884Ala | c.5650A>G              | 0 exonic    | misse |
| TET2  | 0.24  | chr4:1061973 | SNV   | A         | A/G         | 0           | 1998 | GCC | 11 p.Thr1884Ala | c.5650A>G              | 0 exonic    | misse |
| TET2  | 0.112 | chr4:1061973 | SNV   | A         | A/G         | 0           | 1807 | GGG | 11 p.Arg1891Gly | c.5671A>G              | 0 exonic    | misse |
| TET2  | 0.43  | chr4:1061973 | SNV   | A         | A/G         | 0           | 1419 | GGG | 11 p.Arg1891Gly | c.5671A>G              | 0 exonic    | misse |
| TET2  | 0.40  | chr4:1061974 | SNV   | G         | G/T         | 0           | 1572 | TAG | 11 p.Glu1931Ter | c.5791G>T              | exonic      | nonse |
| TP53  | 0.06  | chr17:757840 | SNV   | C         | C/T         | 0           | 2000 | CAC | 5 p.Arg175His   | c.524G>A               | exonic      | misse |
| TP53  | 0.042 | chr17:757845 | SNV   | G         | G/A         | 2.26475E-06 | 2000 | TGC | 5 p.Arg158Cys   | c.472C>T               | 0 exonic    | misse |
| UZAF1 | 0.34  | chr21:445147 | SNV   | T         | T/G         | 0           | 2000 | CCG | 6 p.Gln157Pro   | c.470A>C               | exonic      | misse |

Supplemental Table 4. CH/subtypes group demographics (total N=359)

| Variable                           | No CH (N=276) |                  |            | CH (N=83)     |                  |            | VAF>0.1 (N=36) (vs. VAF≤0.1 or no mutation) |                  |            | Mut>1 (N=11) (vs. Mut≤1 or no mutation) |                    |            | TET2 mutation (N=34) |                  |            | DNMT3A mutation (N=32) |                  |            |
|------------------------------------|---------------|------------------|------------|---------------|------------------|------------|---------------------------------------------|------------------|------------|-----------------------------------------|--------------------|------------|----------------------|------------------|------------|------------------------|------------------|------------|
|                                    | % male (n)    |                  |            | % male (n)    |                  |            | % male (n)                                  |                  |            | % male (n)                              |                    |            | % male (n)           |                  |            | % male (n)             |                  |            |
| Sex                                | 33.7 (93)     |                  |            | 36.1 (30)     |                  |            | 38.9 (14)                                   |                  |            | 54.5 (6)                                |                    |            | 50 (17)              |                  |            | 25 (8)                 |                  |            |
|                                    | mean (SD)     | median (IQR)     | range      | mean (SD)     | median (IQR)     | range      | mean (SD)                                   | median (IQR)     | range      | mean (SD)                               | median (IQR)       | range      | mean (SD)            | median (IQR)     | range      | mean (SD)              | median (IQR)     | range      |
| Age (y)                            | 80 (8)        | 81 (73-86)       | 65-97      | 82 (8) *      | 83 (75-88)       | 65-104     | 83 (7) *                                    | 84 (79-88)       | 65-97      | 86 (6) *                                | 85 (80-87)         | 79-100     | 82 (8)               | 83 (79-88)       | 68-97      | 81 (9)                 | 80 (76-86)       | 65-104     |
| Hemoglobin (g/L)                   | 131 (14)      | 133 (122-141)    | 84-166     | 129 (13)      | 127 (120-141)    | 100-160    | 129 (14)                                    | 128 (119-139)    | 100-160    | 120 (12) *                              | 124 (110-132)      | 101-134    | 129 (14)             | 133 (120-141)    | 100-160    | 126 (13)               | 125 (119-139)    | 101-150    |
| Platelets                          | 219 (54)      | 217 (183-248)    | 91-471     | 219 (93)      | 196 (167-253)    | 18-746     | 224 (114)                                   | 200 (163-261)    | 78-746     | 176 (64)                                | 166 (131-226) ^    | 78-298     | 203 (61)             | 193 (164-243)    | 78-392     | 224 (76)               | 201 (174-254)    | 101-408    |
| Monocytes (x 10 <sup>9</sup> /L)   | 0.6 (0.2)     | 0.5 (0.5-0.7)    | 0.3-1.4    | 0.6 (0.2)     | 0.6 (0.5-0.8)    | 0.3-1.3    | 0.6 (0.2)                                   | 0.6 (0.5-0.8)    | 0.3-1.1    | 0.7 (0.2)                               | 0.7 (0.4-0.8)      | 0.3-1.1    | 0.6 (0.2)            | 0.6 (0.4-0.8)    | 0.3-1.1    | 0.6 (0.2)              | 0.6 (0.5-0.7)    | 0.3-1.3    |
| WBC (x 10 <sup>9</sup> /L)         | 7 (1.8)       | 6.7 (5.8-7.7)    | 3.6-19.7   | 6.9 (2.1)     | 6.6 (5.3-8.1)    | 3-13.1     | 6.8 (1.9)                                   | 6.8 (5.2-8.1)    | 4.1-10.7   | 5.5 (1.3) *                             | 5.2 (4.2-7.1)      | 4.1-7.5    | 6.7 (1.9)            | 6.5 (5.2-7.5)    | 3.6-11.5   | 7.2 (2.3)              | 7.1 (5.4-8.8)    | 3.9-13.1   |
| ANC (x 10 <sup>9</sup> /L)         | 4.5 (1.6)     | 4.3 (3.5-5.2)    | 1.6-16.2   | 4.5 (1.7)     | 4.3 (3.4-5.3)    | 0.4-10.3   | 4.5 (1.5)                                   | 4.5 (3.3-5.7)    | 0.4-7.8    | 4.1 (1.5)                               | 3.5 (3-5.3)        | 2.6-7.4    | 4.4 (1.4)            | 4.2 (3.3-5.1)    | 1.7-7.8    | 4.7 (1.8)              | 4.5 (3.3-5.6)    | 2.4-10.3   |
| ALC (x 10 <sup>9</sup> /L)         | 1.6 (0.6)     | 1.6 (1.3-2)      | 0.3-3.7    | 1.6 (0.7)     | 1.4 (1.1-1.8)    | 0.5-4.5    | 1.5 (0.6)                                   | 1.4 (1-1.8)      | 0.8-2.9    | 1.1 (0.3) *                             | 1 (1-1.2)          | 0.9-1.9    | 1.5 (0.7)            | 1.3 (1-1.8)      | 0.8-4.5    | 1.6 (0.7)              | 1.5 (1.2-1.8)    | 0.6-3.8    |
| RDW (%)                            | 14.3 (1.4)    | 14 (13.2-14.8)   | 12.3-21.2  | 14.4 (1.4)    | 14.1 (13.6-15)   | 11.9-19.1  | 14.8 (1.6) *                                | 14.7 (13.8-15.2) | 12.8-19.1  | 14.4 (1.1)                              | 14.4 (13.6-15.1)   | 12.9-16.7  | 14.3 (1.1)           | 14.1 (13.6-14.9) | 11.9-16.9  | 14 (1)                 | 13.9 (13.5-14.8) | 12.3-16.7  |
| MCV (fl)                           | 90.3 (5.7)    | 90.4 (87.2-93.7) | 63.9-106.3 | 90.6 (4.8)    | 90.6 (87.3-94.3) | 76.2-102.2 | 90.6 (5)                                    | 90.5 (87.1-93.7) | 80.7-102.2 | 91.9 (4.5)                              | 91.1 (88.5-94.9)   | 84.2-101.3 | 90.5 (4.6)           | 90.6 (87.1-92.8) | 80.7-102.2 | 90.2 (4.8)             | 90.6 (88.1-93.5) | 76.2-96.4  |
| Retic Count (x 10 <sup>9</sup> /L) | 56 (19)       | 54 (44-66)       | 14-115     | 57 (21)       | 53 (40-68)       | 21-111     | 61 (22)                                     | 57 (44-77)       | 34-111     | 56 (21)                                 | 48 (44-66)         | 36-107     | 59 (21)              | 54 (44-74)       | 32-111     | 53 (19)                | 47 (38-64)       | 21-100     |
| LDH (IU/L)                         | 184 (38)      | 179 (160-205)    | 88-351     | 190 (36)      | 188 (165-207)    | 114-305    | 188 (33)                                    | 188 (170-207)    | 114-253    | 184 (15)                                | 182 (170-196)      | 165-210    | 181 (30)             | 182 (158-205)    | 114-252    | 193 (36)               | 190 (170-206)    | 136-305    |
| Ferritin (ug/L)                    | 130.6 (107.9) | 100.5 (53-180)   | 0.3-695    | 123.3 (102.6) | 91 (50-176)      | 17-527     | 150.6 (136.1)                               | 96.5 (52.5-218)  | 17-527     | 99.2 (69.5)                             | 92 (43-111)        | 28-282     | 122.6 (97.3)         | 95 (58-162)      | 23-527     | 106.7 (72.7)           | 84.5 (43-178.5)  | 17-257     |
| Iron (umol/L)                      | 14 (5)        | 14 (10-17)       | 2-39       | 14 (5)        | 13 (10-17)       | 4-27       | 13 (5)                                      | 12 (10-16)       | 4-27       | 14 (3)                                  | 13 (10-17)         | 10-18      | 14 (5)               | 13 (11-17)       | 7-25       | 12 (4)                 | 12 (10-14)       | 4-23       |
| TIBC (Umol/L)                      | 54 (10)       | 54 (48-59)       | 15-94      | 54 (10)       | 55 (47-60)       | 25-80      | 55 (9)                                      | 55 (49-60)       | 36-80      | 54 (8)                                  | 56 (47-59)         | 41-65      | 53 (8)               | 54 (48-58)       | 25-65      | 55 (11)                | 57 (44-61)       | 34-80      |
| Vitamin B12 (pmol/L)               | 442 (291)     | 355 (255-525)    | 99-1476    | 414 (223)     | 372 (281-488)    | 55-1449    | 399 (228)                                   | 331 (278-485)    | 146-1449   | 341 (77)                                | 343 (279-421)      | 218-453    | 443 (274)            | 370 (283-566)    | 55-1449    | 345 (144)              | 300 (268-408)    | 116-877    |
| TSH (mIU/L)                        | 2.3 (1.6)     | 2 (1.4-2.8)      | 0-15.5     | 3.1 (3.5)     | 2.2 (1.5-3.4) ^  | 0.4-27.8   | 3.8 (4.9)                                   | 2.3 (1.6-3.9) ^  | 0.5-27.8   | 3.4 (2.4)                               | 2.5 (1.3-5.6)      | 0.4-7.6    | 3.8 (4.6)            | 2.6 (1.8-3.8) ^  | 0.5-27.8   | 2.5 (1.6)              | 2.4 (1.6-3.3)    | 0.4-9.5    |
| CRP                                | 4.5 (12.6)    | 2 (1-4)          | 0.5-152    | 5.5 (14.1)    | 2 (1-5)          | 0.5-95     | 6.6 (15.8)                                  | 2 (1-6)          | 0.5-95     | 1.6 (1.9)                               | 1 (0.5-2) ^        | 0.5-7      | 3 (2.3)              | 2 (1-5)          | 0.5-9      | 9.4 (21.9)             | 3.5 (1-6)        | 0.5-95     |
| AST (IU/L)                         | 23 (8)        | 21 (18-25)       | 11-71      | 21 (6)        | 21 (18-23)       | 11-49      | 21 (6)                                      | 20 (17-23)       | 11-39      | 21 (6)                                  | 21 (15-25)         | 11-30      | 21 (6)               | 21 (18-24)       | 11-35      | 21 (7)                 | 21 (18-23)       | 11-49      |
| ALT(IU/L)                          | 20 (10)       | 17 (14-23)       | 4-102      | 18 (8)        | 16 (13-22)       | 4-50       | 18 (10)                                     | 16 (13-22)       | 4-50       | 18 (9)                                  | 16 (13-21)         | 4-35       | 18 (8)               | 16 (13-21)       | 4-43       | 19 (8)                 | 18 (14-22)       | 4-39       |
| T bili (umol/L)                    | 8.3 (5.7)     | 7 (5-10)         | 1.5-61     | 8.2 (4.2)     | 7 (5-10)         | 1.5-22     | 7.6 (3.3)                                   | 7 (5-9)          | 1.5-15     | 7.1 (1.9)                               | 7 (6-9)            | 4-10       | 8.7 (4.4)            | 7 (7-10)         | 3-22       | 7.5 (3.8)              | 7 (5-10)         | 1.5-19     |
| Creatinine (umol/L)                | 86 (35)       | 80 (67-96)       | 42-428     | 92 (36)       | 81 (71-110)      | 47-307     | 94 (43)                                     | 87 (68-113)      | 56-307     | 99 (31)                                 | 106 (71-119)       | 57-154     | 95 (44)              | 85 (71-111)      | 47-307     | 94 (35)                | 81 (71-116)      | 47-192     |
| Creatinine Clearance (ml/min)      | 60.6 (20.8)   | 60.7 (46.6-74)   | 8.2-143.3  | 57.3 (22.1)   | 57.6 (40-70)     | 24.4-126.8 | 57.2 (22.8)                                 | 57.4 (39.9-70.2) | 26.3-126.8 | 51.3 (27.9)                             | 42.6 (32.2-57.6) ^ | 25.9-126.8 | 59.1 (20.1)          | 57.8 (45.1-72)   | 27.6-126.8 | 55.6 (25.8)            | 55.4 (34.8-67)   | 24.4-116.1 |
| Albumin (g/L)                      | 43 (3)        | 43 (41-45)       | 31-50      | 43 (3)        | 44 (42-45)       | 31-51      | 43 (3)                                      | 43 (42-45)       | 38-50      | 43 (2)                                  | 43 (42-45)         | 38-46      | 44 (3)               | 44 (42-45)       | 38-49      | 43 (3)                 | 43 (41-45)       | 31-48      |
| Calcium (mmol/L)                   | 2.4 (0.1)     | 2.4 (2.3-2.5)    | 2-2.8      | 2.4 (0.1)     | 2.4 (2.3-2.5)    | 2.2-2.7    | 2.4 (0.1)                                   | 2.4 (2.3-2.5)    | 2.2-2.7    | 2.4 (0.1)                               | 2.4 (2.3-2.4)      | 2.3-2.5    | 2.4 (0.1)            | 2.4 (2.3-2.5)    | 2.2-2.6    | 2.4 (0.1)              | 2.4 (2.3-2.4)    | 2.2-2.6    |

\* denotes <0.05 significance without correcting for multiple comparisons; ^ denotes significance with Mann-Whitney without correcting for multiple comparisons.





| SAP 2005 - 2006 |       |        |        | SAP 2007 - 2008 |       |        |        | SAP 2009 - 2010 |       |        |        | SAP 2011 - 2012 |       |        |        | SAP 2013 - 2014 |       |        |        | SAP 2015 - 2016 |       |        |        |      |       |        |        |      |       |       |        |      |       |       |        |      |       |       |        |      |       |       |        |      |       |       |        |
|-----------------|-------|--------|--------|-----------------|-------|--------|--------|-----------------|-------|--------|--------|-----------------|-------|--------|--------|-----------------|-------|--------|--------|-----------------|-------|--------|--------|------|-------|--------|--------|------|-------|-------|--------|------|-------|-------|--------|------|-------|-------|--------|------|-------|-------|--------|------|-------|-------|--------|
| Year            | Value | Change | Index  | Year | Value | Change | Index  |      |       |       |        |      |       |       |        |      |       |       |        |      |       |       |        |      |       |       |        |
| 2005            | 1.000 | 0.000  | 100.00 | 2006            | 1.000 | 0.000  | 100.00 | 2007            | 1.000 | 0.000  | 100.00 | 2008            | 1.000 | 0.000  | 100.00 | 2009            | 1.000 | 0.000  | 100.00 | 2010            | 1.000 | 0.000  | 100.00 | 2011 | 1.000 | 0.000  | 100.00 | 2012 | 1.000 | 0.000 | 100.00 | 2013 | 1.000 | 0.000 | 100.00 | 2014 | 1.000 | 0.000 | 100.00 | 2015 | 1.000 | 0.000 | 100.00 | 2016 | 1.000 | 0.000 | 100.00 |
| 2005            | 1.000 | 0.000  | 100.00 | 2006            | 1.000 | 0.000  | 100.00 | 2007            | 1.000 | 0.000  | 100.00 | 2008            | 1.000 | 0.000  | 100.00 | 2009            | 1.000 | 0.000  | 100.00 | 2010            | 1.000 | 0.000  | 100.00 | 2011 | 1.000 | 0.000  | 100.00 | 2012 | 1.000 | 0.000 | 100.00 | 2013 | 1.000 | 0.000 | 100.00 | 2014 | 1.000 | 0.000 | 100.00 | 2015 | 1.000 | 0.000 | 100.00 | 2016 | 1.000 | 0.000 | 100.00 |
| 2005            | 1.000 | 0.000  | 100.00 | 2006            | 1.000 | 0.000  | 100.00 | 2007            | 1.000 | 0.000  | 100.00 | 2008            | 1.000 | 0.000  | 100.00 | 2009            | 1.000 | 0.000  | 100.00 | 2010            | 1.000 | 0.000  | 100.00 | 2011 | 1.000 | 0.000  | 100.00 | 2012 | 1.000 | 0.000 | 100.00 | 2013 | 1.000 | 0.000 | 100.00 | 2014 | 1.000 | 0.000 | 100.00 | 2015 | 1.000 | 0.000 | 100.00 | 2016 | 1.000 | 0.000 | 100.00 |

Source: SAP 2005 - 2006, SAP 2007 - 2008, SAP 2009 - 2010, SAP 2011 - 2012, SAP 2013 - 2014, SAP 2015 - 2016
